# Supplementary material for: Targeted Metabolic Analysis and MFA of Insect Cells Expressing Influenza HA-VLP
Source: MDPI journal article supplement (doi:10.3390/pr10112283), 2022-11-04
Supplement: s1 [file s1]

## Supplementary Information

**Supplementary Table S1.** List of biochemical reactions considered in insect High Five cells metabolic model.

| Reversible                          | Reaction                                                                                          | Enzyme(s)                                                                    | Acronym |
|-------------------------------------|---------------------------------------------------------------------------------------------------|------------------------------------------------------------------------------|---------|
| <b>Glycolysis</b>                   |                                                                                                   |                                                                              |         |
| 0                                   | Glc + ATP <-> G6P + ADP                                                                           | Hexokinase                                                                   | HK      |
| 0                                   | G6P <-> F6P                                                                                       | Phosphoglucose isomerase                                                     | PGI     |
| 0                                   | F6P + ATP <-> 2 GAP + ADP                                                                         | Phosphofructokinase, aldolase, Triose Phosphate isomerase                    | ALD     |
| 0                                   | GAP + NAD + ADP <-> PEP + NADH + ATP                                                              | GAP dehydrogenase, Phosphoglycerate kinase, Phosphoglycerate mutase, enolase | GAPDH   |
| -1                                  | PEP + ADP -> Pyr + ATP                                                                            | Pyruvate kinase                                                              | PK      |
| <b>Pentose Phosphate Pathway</b>    |                                                                                                   |                                                                              |         |
| -1                                  | G6P + 2 NADP -> R5P + CO <sub>2</sub> + 2 NADPH                                                   | Glucose-6-P dehydrogenase                                                    | PPPox   |
| <b>Tricarboxylic Acid Cycle</b>     |                                                                                                   |                                                                              |         |
| -1                                  | ACoA + OAA -> Cit                                                                                 | Citrate synthase                                                             | CS      |
| 0                                   | Cit + NAD <-> aKG + CO <sub>2</sub> + NADH                                                        | Acotinase, Isocitrate dehydrogenase                                          | IDH     |
| -1                                  | aKG + NAD -> SuCoA + CO <sub>2</sub> + NADH                                                       | $\alpha$ -ketoglutarate dehydrogenase                                        | ADH     |
| 0                                   | SuCoA + ADP <-> Suc + ATP                                                                         | SuCoA synthetase                                                             | SS      |
| 0                                   | Suc + FAD <-> Fum + FADH <sub>2</sub>                                                             | Succinil dehydrogenase                                                       | SDH     |
| 0                                   | Fum <-> Mal                                                                                       | Fumarase                                                                     | Fum     |
| 0                                   | Mal + NAD <-> OAA + NADH                                                                          | Malate dehydrogenase                                                         | MDH     |
| <b>Pyruvate Node</b>                |                                                                                                   |                                                                              |         |
| -1                                  | Pyr + NAD -> ACoA + CO <sub>2</sub> + NADH                                                        | Pyruvate dehydrogenase                                                       | PDH     |
| 0                                   | Pyr + NADH <-> Lac + NAD                                                                          | Lactate dehydrogenase                                                        | LDH     |
| 0                                   | Pyr + Glu <-> Ala + aKG                                                                           | Alanine aminotransferase                                                     | AlaAT   |
| <b>Anaplerotic and Cataplerotic</b> |                                                                                                   |                                                                              |         |
| 0                                   | Mal + NADP <-> Pyr + CO <sub>2</sub> + NADPH                                                      | Malic Enzyme                                                                 | ME      |
| <b>Oxidative Phosphorilation</b>    |                                                                                                   |                                                                              |         |
| -1                                  | NADH + 0.5 O <sub>2</sub> + 2.5 ADP -> NAD + 2.5 ATP                                              |                                                                              |         |
| -1                                  | FADH <sub>2</sub> + 0.5 O <sub>2</sub> + 1.5 ADP -> FAD + 1.5 ATP                                 |                                                                              |         |
| <b>Amino acid Degradation</b>       |                                                                                                   |                                                                              |         |
| -1                                  | Gln -> Glu + NH <sub>4</sub> <sup>+</sup>                                                         | Gln dehydrogenase                                                            | GlnDeg  |
| -1                                  | Glu + NAD <-> aKG + NADH + NH <sub>4</sub> <sup>+</sup>                                           | Glu dehydrogenase                                                            | GDH     |
| -1                                  | Glu + NADPH -> Pro + NADP                                                                         | Pro dehydrogenase                                                            | ProDH   |
| -1                                  | Arg + aKG + NAD -> 2 Glu + NADH + urea                                                            | Arginase                                                                     | ArgDeg  |
| -1                                  | His -> Glu + CO <sub>2</sub> + 2 NH <sub>4</sub> <sup>+</sup>                                     | His NH <sub>4</sub> <sup>+</sup> lyase;                                      | HisDeg  |
| -1                                  | Val + aKG + 3 NAD + FAD + ATP -> SuCoA + Glu + CO <sub>2</sub> + 3 NADH + FADH <sub>2</sub> + ADP | Val dehydrogenase                                                            | ValDeg  |
| -1                                  | Ile + aKG + ATP + 2 NAD -> SuCoA + ACoA + Glu + CO <sub>2</sub> + ADP + 2 NADH                    | Ile aminotransferase                                                         | IleAT   |
| -1                                  | Met + Ser + NAD + 2 ATP -> SuCoA + Cys + C1 + NH <sub>4</sub> <sup>+</sup> + NADH + 2 ADP         | Met oxidase                                                                  | MetDeg  |
| -1                                  | Asn -> Asp + NH <sub>4</sub> <sup>+</sup>                                                         | Asparaginase                                                                 | AsnDeg  |

|                                               |                                                                                                                                                                                                                                                                         |                        |        |
|-----------------------------------------------|-------------------------------------------------------------------------------------------------------------------------------------------------------------------------------------------------------------------------------------------------------------------------|------------------------|--------|
| -1                                            | Asp + aKG <-> OAA + Glu                                                                                                                                                                                                                                                 | Asp aminotransferase   | AspAT  |
| -1                                            | Phe + NADH + O <sub>2</sub> -> Tyr + NAD                                                                                                                                                                                                                                | Phe hydroxylase        | PheDeg |
| -1                                            | Tyr + aKG + 2 O <sub>2</sub> -> Fum + 2 ACoA + CO <sub>2</sub> + Glu                                                                                                                                                                                                    | Tyr aminotransferase   | TyrDeg |
| -1                                            | Cys -> Pyr + NH <sub>4</sub> <sup>+</sup>                                                                                                                                                                                                                               | Cys lyase              | CysDeg |
| -1                                            | Ser <-> Pyr + Gly + NH <sub>4</sub> <sup>+</sup>                                                                                                                                                                                                                        | Ser deaminase          | SerDA  |
| -1                                            | 2 Gly + NAD -> Ser + CO <sub>2</sub> + NH <sub>4</sub> <sup>+</sup> + NADH                                                                                                                                                                                              | Gly hydroxitransferase | GlyDeg |
| -1                                            | Thr + NAD -> Gly + ACoA + NADH                                                                                                                                                                                                                                          | Thr aldolase           | ThrAD  |
| -1                                            | Leu + aKG + NAD + ATP -> 3 ACoA + Glu + NADH + ADP                                                                                                                                                                                                                      | Leu dehydrogenase      | LeuDH  |
| -1                                            | Lys + 2 aKG + 4 NAD + NADPH -> 2 ACoA + 2 CO <sub>2</sub> + 2 Glu + 4 NADH + NADP                                                                                                                                                                                       | Lysine 2-monooxidase   | LysDeg |
| <b>Transport</b>                              |                                                                                                                                                                                                                                                                         |                        |        |
|                                               | Glc.ext -> Glc                                                                                                                                                                                                                                                          |                        |        |
|                                               | Lac -> Lac.ext                                                                                                                                                                                                                                                          |                        |        |
|                                               | NH <sub>4</sub> <sup>+</sup> -> NH <sub>4</sub> <sup>+</sup> .ext                                                                                                                                                                                                       |                        |        |
|                                               | Ala <-> Ala.ext                                                                                                                                                                                                                                                         |                        |        |
|                                               | CO <sub>2</sub> -> CO <sub>2</sub> .ext                                                                                                                                                                                                                                 |                        |        |
|                                               | Glu.ext + 1 ATP -> Glu + 1 ADP                                                                                                                                                                                                                                          |                        |        |
|                                               | Asp.ext + 1 ATP -> Asp + 1 ADP                                                                                                                                                                                                                                          |                        |        |
|                                               | Gln.ext + 0.33 ATP -> Gln + 0.33 ADP                                                                                                                                                                                                                                    |                        |        |
|                                               | Asn.ext + 0.33 ATP -> Asn + 0.33 ADP                                                                                                                                                                                                                                    |                        |        |
|                                               | Arg.ext + 0.33 ATP -> Arg + 0.33 ADP                                                                                                                                                                                                                                    |                        |        |
|                                               | Gly.ext + 0.33 ATP -> Gly + 0.33 ADP                                                                                                                                                                                                                                    |                        |        |
|                                               | His.ext + 0.33 ATP -> His + 0.33 ADP                                                                                                                                                                                                                                    |                        |        |
|                                               | Ile.ext + 0.33 ATP -> Ile + 0.33 ADP                                                                                                                                                                                                                                    |                        |        |
|                                               | Leu.ext + 0.33 ATP -> Leu + 0.33 ADP                                                                                                                                                                                                                                    |                        |        |
|                                               | Lys.ext + 0.33 ATP -> Lys + 0.33 ADP                                                                                                                                                                                                                                    |                        |        |
|                                               | Met.ext + 0.33 ATP -> Met + 0.33 ADP                                                                                                                                                                                                                                    |                        |        |
|                                               | Phe.ext + 0.33 ATP -> Phe + 0.33 ADP                                                                                                                                                                                                                                    |                        |        |
|                                               | Ser.ext + 0.33 ATP -> Ser + 0.33 ADP                                                                                                                                                                                                                                    |                        |        |
|                                               | Thr.ext + 0.33 ATP -> Thr + 0.33 ADP                                                                                                                                                                                                                                    |                        |        |
|                                               | Tyr.ext + 0.33 ATP -> Tyr + 0.33 ADP                                                                                                                                                                                                                                    |                        |        |
|                                               | Val.ext + 0.33 ATP -> Val + 0.33 ADP                                                                                                                                                                                                                                    |                        |        |
| <b>Biomass &amp; Macromolecules Synthesis</b> |                                                                                                                                                                                                                                                                         |                        |        |
| -1                                            | 0.758 Ala + 0.276 Glu + 0.347 Gln + 0.931 Gly + 0.537 Ser + 0.38 Lys + 0.506 Leu + 0.263 Ile + 0.279 Arg + 0.289 Asp + 0.394 Thr + 0.421 Val + 0.119 Met + 0.158 Phe + 0.117 Tyr + 0.114 His + 0.374 Pro + 0.273 Asn + 0.189 Cys + 10.014 ATP -> 1 Protein + 10.014 ADP |                        | Prot   |
| -1                                            | 0.5 CO <sub>2</sub> + R5P + 1.9 Gln + 1.3 Ser + 1.3 Asp + 0.7 NAD + NADPH + 9 ATP -> 1.9 Glu + 0.8 Fum + 0.8 Gly + DNA + 0.7 NADH + NADP + 9 ADP                                                                                                                        |                        | DNA    |
| -1                                            | CO <sub>2</sub> + R5P + 1.9 Gln + Ser + 1.3 Asp + NAD + ATP -> Glu + 0.8 Fum + 0.5 Gly + RNA + NADH + ADP                                                                                                                                                               |                        | RNA    |
| -1                                            | 9 ACoA + 7 NADPH + 26 ATP + 10 NADH + 1 O <sub>2</sub> -> 1 FA + 7 NADP + 26 ADP + 10 NAD                                                                                                                                                                               |                        | FA     |
| -1                                            | 1000 Protein + 219.8 FA + 177.3 DNA + 445 RNA -> 1 Biomass                                                                                                                                                                                                              |                        | Biom   |

*Table footnote: Reaction Reversibility: 0 – reversible / -1 – irreversible. Acronym codes: aKG – alpha-ketoglutarate; ACoA – Acetyl-CoA; ADP – Adenosine diphosphate; Ala – Alanine; Arg – Arginine; Asn – Asparagine; Asp – Aspartic acid; ATP – Adenosine triphosphate; Cit – Citrate; CO<sub>2</sub> – Carbon dioxide; Cys – Cysteine; DNA – Deoxyribonucleic acid; F6P – Fructose 6-phosphate; FA – Fatty acid; FAD/FADH<sub>2</sub> – Flavin adenine dinucleotide; Fum – Fumarate; G6P – Glucose 6-phosphate; GAP – Glycerol aldehyde phosphate; Glc – Glucose; Gln – Glutamine; Glu – Glutamic acid; Gly – Glycine; His – Histidine; Ile – Isoleucine; Leu – Leucine; Lys – Lysine; Mal – Malate; Met – Methionine; NAD/NADH - Nicotinamide adenine dinucleotide; NADPNADPH – Nicotinamide adenine dinucleotide phosphate; NH<sub>4</sub><sup>+</sup> - Ammonium; O<sub>2</sub> – oxygen; OAA – Oxaloacetic acid; PEP – Phosphoenol pyruvate; Phe – Phenylalanine; Pyr – Pyruvate; R5P – Ribose-5-phosphate; RNA – Ribonucleic acid; Ser – Serine; Suc – Succinate; SuCoA – Succinate-CoA; Thr – Threonine; Tyr – Tyrosine; Val – Valine*

Supplementary Table S2. Biochemical reactions rates assessed by MFA analysis.

|                                    | Acronym | Reaction                                                                  | Cell Growth Phase | Infection Phase |             |             |             |            |           |             |           |
|------------------------------------|---------|---------------------------------------------------------------------------|-------------------|-----------------|-------------|-------------|-------------|------------|-----------|-------------|-----------|
|                                    |         |                                                                           |                   | Group 1         |             |             |             | Group 2    |           |             |           |
|                                    |         |                                                                           |                   | Monovalent      |             | Multivalent |             | Monovalent |           | Multivalent |           |
|                                    |         |                                                                           |                   | Rate ± SD       | Rate ± SD   | Rate ± SD   | Rate ± SD   | Rate ± SD  | Rate ± SD | Rate ± SD   | Rate ± SD |
| Glycolysis                         | HK      | Glc + ATP = G6P + ADP                                                     | 120.7 ± 33.2      | 109.1 ± N/D     | 189.2 ± N/D | 191.9 ± N/D | 202.5 ± N/D |            |           |             |           |
|                                    | PGI     | G6P = F6P                                                                 | 110.8 ± 34.5      | 101.7 ± N/D     | 181.0 ± N/D | 183.9 ± N/D | 194.4 ± N/D |            |           |             |           |
|                                    | ALD     | F6P + ATP = 2 GAP + ADP                                                   | 110.8 ± 34.5      | 101.7 ± N/D     | 180.9 ± N/D | 183.9 ± N/D | 194.4 ± N/D |            |           |             |           |
|                                    | GAPDH   | GAP + NAD + ADP = PEP + NADH + ATP                                        | 221.5 ± 70.0      | 203.5 ± N/D     | 362.0 ± N/D | 367.7 ± N/D | 388.9 ± N/D |            |           |             |           |
|                                    | PK      | PEP + ADP = Pyr + ATP                                                     | 221.5 ± 70.0      | 203.5 ± N/D     | 362.0 ± N/D | 367.7 ± N/D | 388.9 ± N/D |            |           |             |           |
| PPP                                | PPPoX   | G6P + 2 NADP = R5P + CO <sub>2</sub> + 2 NADPH                            | 9.9 ± 2.5         | 7.4 ± N/D       | 8.2 ± N/D   | 8.0 ± N/D   | 8.1 ± N/D   |            |           |             |           |
| Pyruvate node                      | LDH     | Pyr + NADH = Lac + NAD                                                    | 18.7 ± 6.2        | 4.2 ± N/D       | -8.3 ± N/D  | 3.1 ± N/D   | 6.5 ± N/D   |            |           |             |           |
|                                    | PDH     | Pyr + NAD = ACoA + CO <sub>2</sub> + NADH                                 | 77.5 ± 7.2        | 38.6 ± N/D      | 34.9 ± N/D  | 48.4 ± N/D  | 43.3 ± N/D  |            |           |             |           |
|                                    | AlaAT   | Pyr + Glu = Ala + αKG                                                     | 185.4 ± 64.5      | 184.9 ± N/D     | 342.3 ± N/D | 342.8 ± N/D | 363.6 ± N/D |            |           |             |           |
| TCA & Anaplerotic and Cataplerotic | CS      | ACoA + OAA = Cit                                                          | 138.5 ± 66.5      | 178.5 ± N/D     | 319.7 ± N/D | 305.1 ± N/D | 343.5 ± N/D |            |           |             |           |
|                                    | IDH     | Cit + NAD = αKG + CO <sub>2</sub> + NADH                                  | 147.8 ± 55.0      | 131.5 ± N/D     | 342.6 ± N/D | 359.2 ± N/D | 341.7 ± N/D |            |           |             |           |
|                                    | ADH     | αKG + NAD = CO <sub>2</sub> + SuCoA + NADH                                | 158.4 ± 66.9      | 207.5 ± N/D     | 377.6 ± N/D | 334.2 ± N/D | 366.0 ± N/D |            |           |             |           |
|                                    | SS      | SuCoA + ADP = Suc + ATP                                                   | 156.1 ± 64.9      | 211.8 ± N/D     | 344.7 ± N/D | 332.6 ± N/D | 369.0 ± N/D |            |           |             |           |
|                                    | SDH     | Suc + FAD = Fum + FADH <sub>2</sub>                                       | 156.1 ± 64.9      | 211.8 ± N/D     | 344.7 ± N/D | 332.6 ± N/D | 369.0 ± N/D |            |           |             |           |
|                                    | Fum     | Fum = Mal                                                                 | 165.1 ± 63.7      | 220.9 ± N/D     | 353.7 ± N/D | 335.9 ± N/D | 378.0 ± N/D |            |           |             |           |
|                                    | MDH     | Mal + NAD = OAA + NADH                                                    | 87.1 ± 57.4       | 182.5 ± N/D     | 315.2 ± N/D | 292.0 ± N/D | 335.5 ± N/D |            |           |             |           |
|                                    | ME      | Mal + NADP = Pyr + CO <sub>2</sub> + NADPH                                | 78.0 ± 8.3        | 38.4 ± N/D      | 38.5 ± N/D  | 43.9 ± N/D  | 42.5 ± N/D  |            |           |             |           |
| Amino Acid Metabolism              | AspAT   | αKG + Asp = Glu + OAA                                                     | 77.5 ± 7.2        | 38.6 ± N/D      | 34.9 ± N/D  | 48.4 ± N/D  | 43.3 ± N/D  |            |           |             |           |
|                                    | AsnDeg  | Asn = Asp + NH <sub>4</sub> <sup>+</sup>                                  | 51.4 ± 11.7       | -4.0 ± N/D      | 4.5 ± N/D   | 13.1 ± N/D  | 8.0 ± N/D   |            |           |             |           |
|                                    | CysDeg  | Cys = Pyr + NH <sub>4</sub> <sup>+</sup>                                  | 63.4 ± 3.4        | 6.9 ± N/D       | 15.3 ± N/D  | 25.0 ± N/D  | 21.7 ± N/D  |            |           |             |           |
|                                    | GlnDeg  | Gln = Glu + NH <sub>4</sub> <sup>+</sup>                                  | 3.1 ± 1.1         | 2.6 ± N/D       | 3.3 ± N/D   | 1.2 ± N/D   | 0.3 ± N/D   |            |           |             |           |
|                                    | GDH     | Glu + NAD = αKG + NH <sub>4</sub> <sup>+</sup> + NADH                     | 3.8 ± 4.5         | 17.1 ± N/D      | 10.8 ± N/D  | 18.1 ± N/D  | 11.1 ± N/D  |            |           |             |           |
|                                    | GlyDeg  | 2 Gly + NAD = Ser + CO <sub>2</sub> + NH <sub>4</sub> <sup>+</sup> + NADH | -16.0 ± 3.9       | -0.3 ± N/D      | -2.7 ± N/D  | -12.2 ± N/D | -6.3 ± N/D  |            |           |             |           |
|                                    | LeuDH   | Leu + αKG + NAD + ATP = 3 ACoA + Glu + NADH + ADP                         | -3.3 ± 1.7        | -2.4 ± N/D      | -3.3 ± N/D  | -3.4 ± N/D  | -3.2 ± N/D  |            |           |             |           |
|                                    | SerDA   | Ser = Pyr + NH <sub>4</sub> <sup>+</sup> + Gly                            | -3.1 ± 0.6        | 2.0 ± N/D       | -0.6 ± N/D  | -1.0 ± N/D  | -0.4 ± N/D  |            |           |             |           |
| Macromol. synthesis                | Prot    | Protein synthesis                                                         | -20.9 ± 1.5       | -16.9 ± N/D     | -18.3 ± N/D | -18.5 ± N/D | -18.2 ± N/D |            |           |             |           |
|                                    | DNA     | DNA synthesis                                                             | 15.9 ± 4.1        | 11.7 ± N/D      | 13.2 ± N/D  | 12.9 ± N/D  | 12.9 ± N/D  |            |           |             |           |
|                                    | RNA     | RNA synthesis                                                             | 2.8 ± 0.7         | 2.1 ± N/D       | 2.4 ± N/D   | 2.3 ± N/D   | 2.3 ± N/D   |            |           |             |           |
|                                    | FA      | Fatty Acid synthesis                                                      | 7.1 ± 1.8         | 5.3 ± N/D       | 5.9 ± N/D   | 5.7 ± N/D   | 5.8 ± N/D   |            |           |             |           |
|                                    | Biomass | Biomass synthesis                                                         | 3.5 ± 0.9         | 2.6 ± N/D       | 2.9 ± N/D   | 2.8 ± N/D   | 2.8 ± N/D   |            |           |             |           |
|                                    | HK      | Glc + ATP = G6P + ADP                                                     | 0.015 ± 0.00      | 0.012 ± N/D     | 0.013 ± N/D | 0.013 ± N/D | 0.013 ± N/D |            |           |             |           |

Table footnote: For cell growth phase, data is expressed as mean ± standard deviation (SD) of four biological replicates (n=4); for infection phase, data is relative to one biological replicate (n=1), N/D - Not Determined.
